# Supplementary figures and images for: The Unique Role of the ECERIFERUM2-LIKE Clade of the BAHD Acyltransferase Superfamily in Cuticular Wax Metabolism
Source: MDPI journal article supplement (doi:10.3390/plants6020023), 2017-06-13

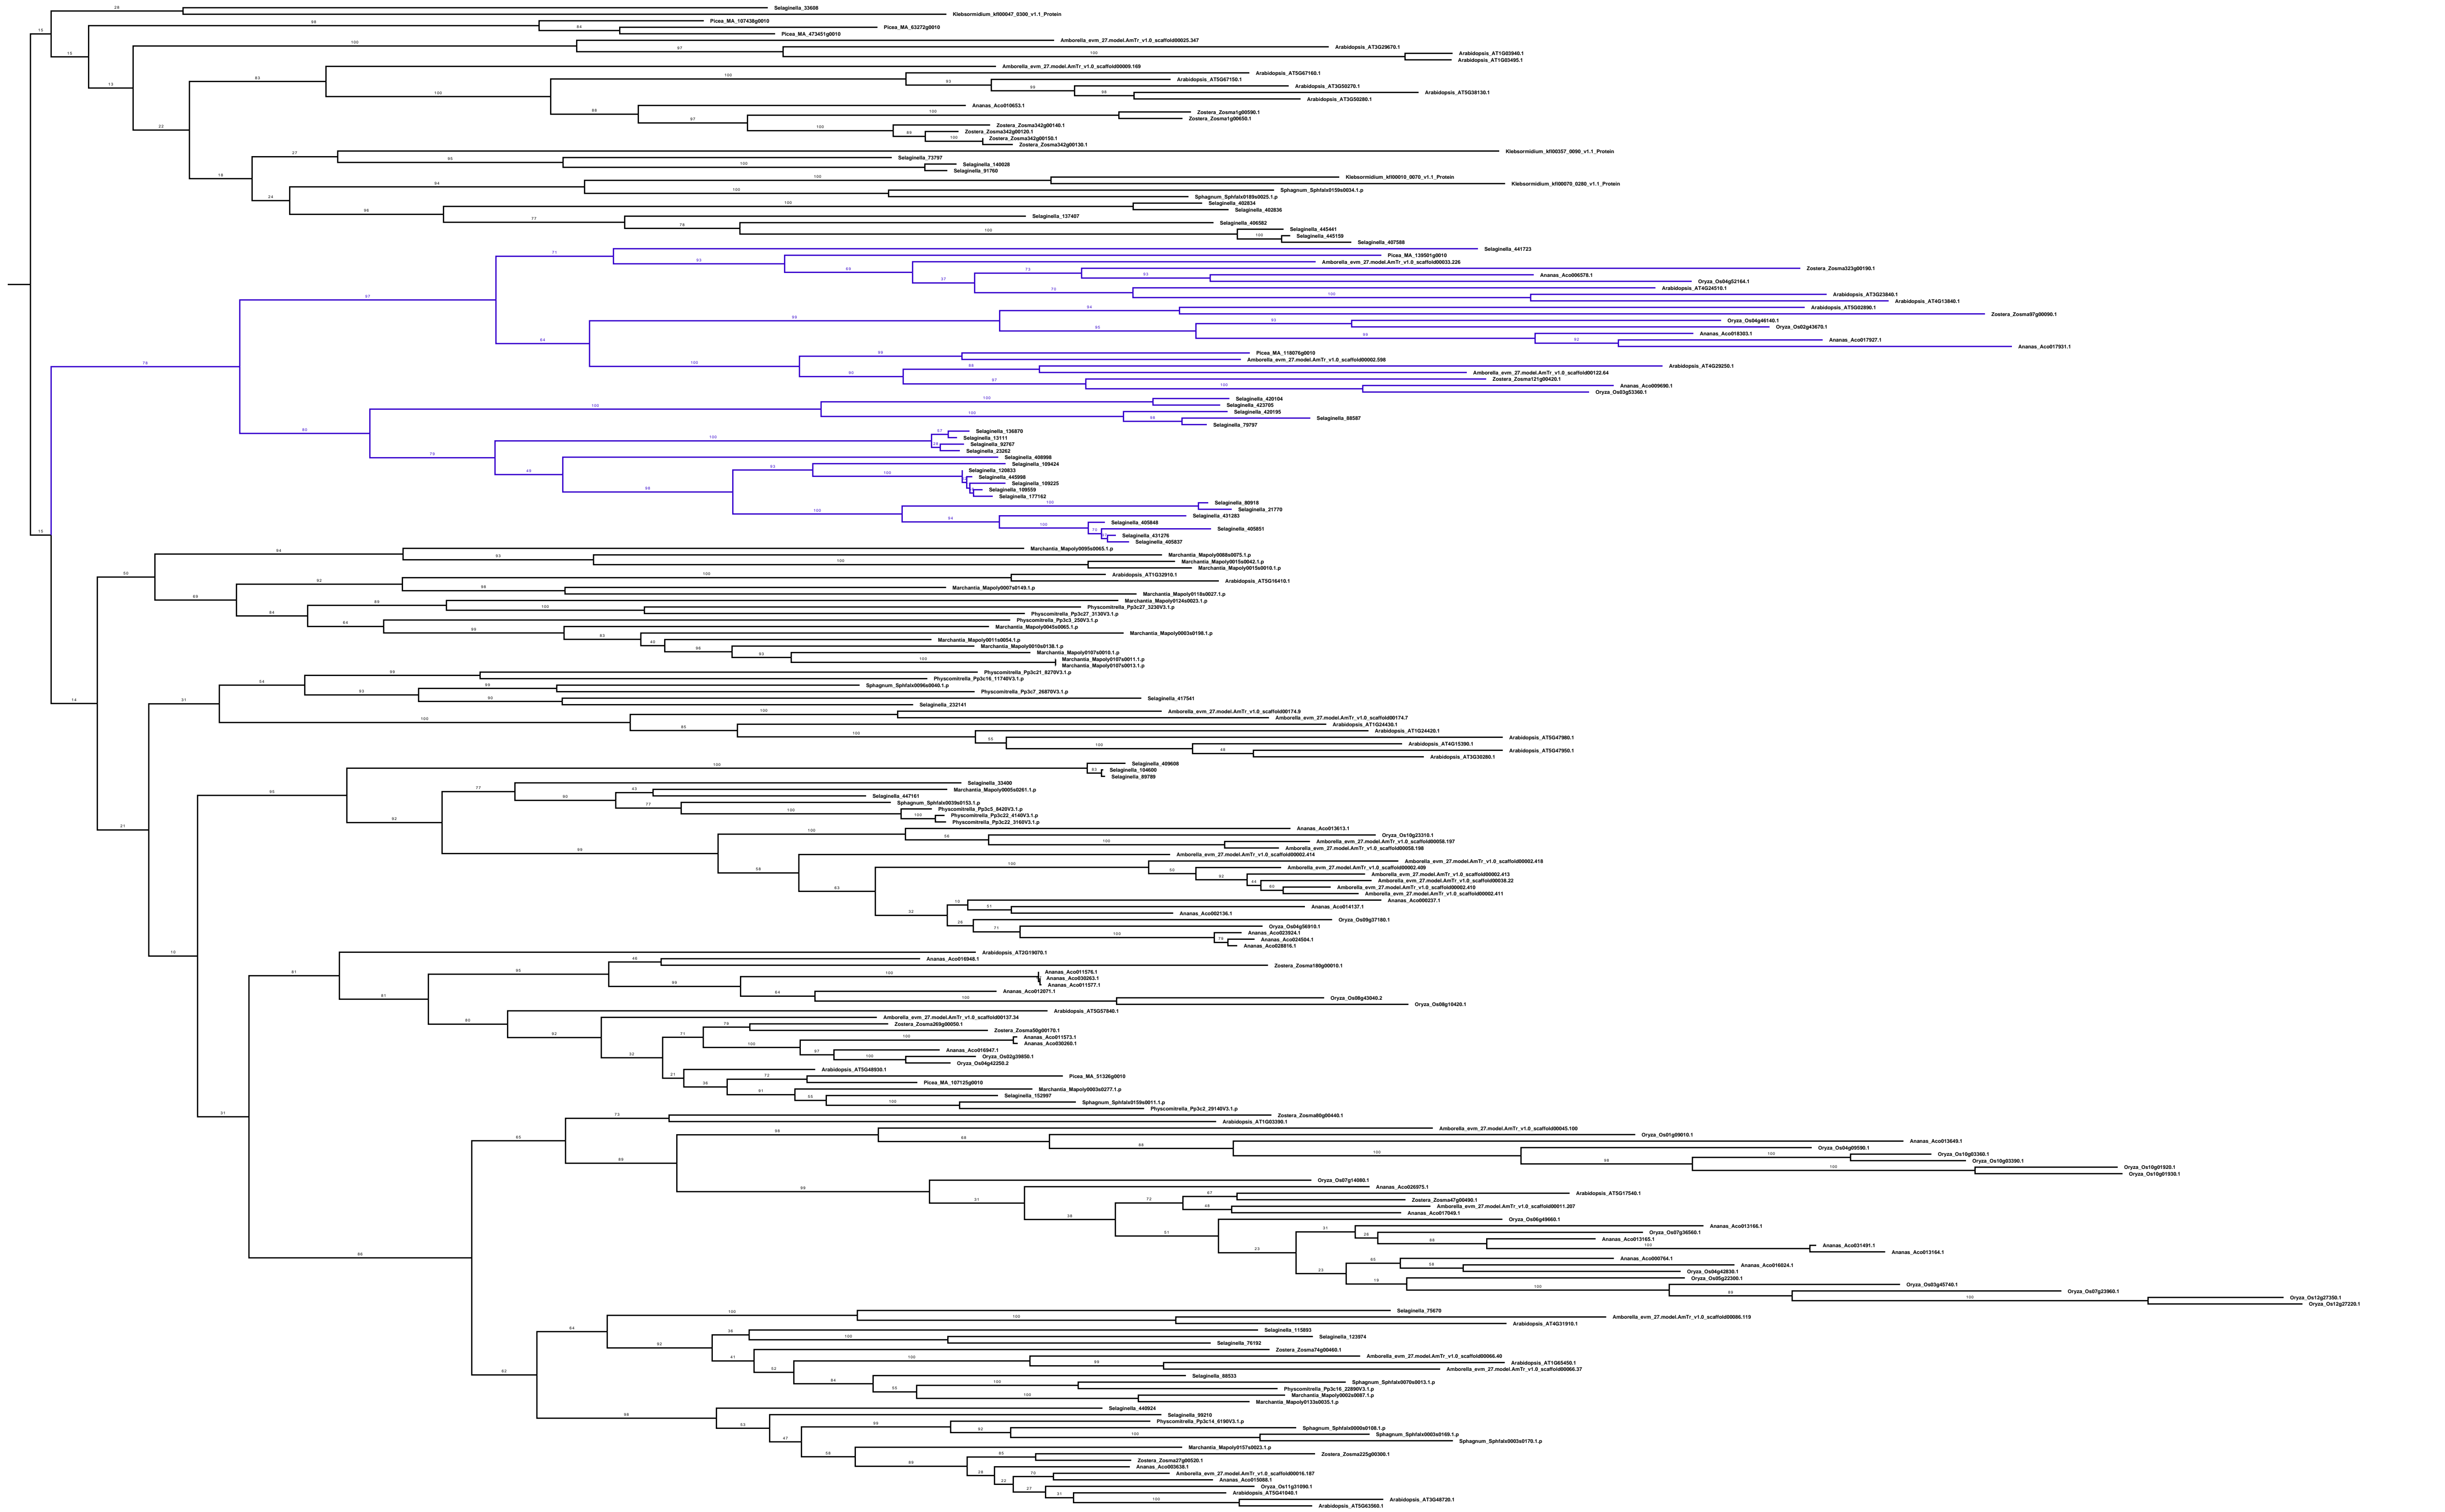

Supplement: s1 [file s1]
